# Supplementary material for: Optimization of Culture Conditions for Production of the Anti-Leukemic Glutaminase Free L-Asparaginase by Newly IsolatedStreptomyces olivaceusNEAE-119 Using Response Surface Methodology
Source: Hindawi journal article supplement (doi:10.1155/2015/627031), 2015-01-01
Supplement: f1 [file 627031.f1.pdf]

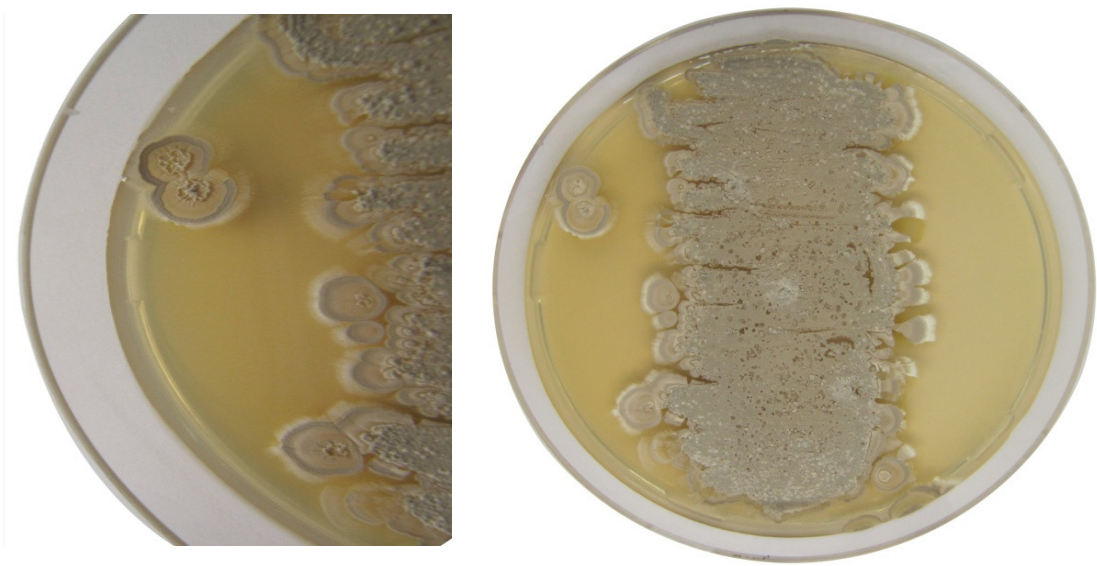

**Fig.** Color of the aerial mycelium of *Streptomyces* sp. NEAE-119 grown on ISP 2 medium (yeast extract -malt extract agar) for 7-14 days of incubation at 30°C.

**Table.** Culture characteristics of the *Streptomyces* sp. strain NEAE-119

| Medium                                             | Color of        |                                     |                    | Growth    |
|----------------------------------------------------|-----------------|-------------------------------------|--------------------|-----------|
|                                                    | Aerial mycelium | Substrate mycelium                  | Diffusible pigment |           |
| ISP 2 medium<br>(Yeast extract -malt extract agar) | Grey            | Yellowish grey<br>(Not-distinctive) | Non-pigmented      | Excellent |
| ISP 3 medium<br>(Oatmeal agar)                     | Grey            | Yellowish grey<br>(Not-distinctive) | Non-pigmented      | Excellent |
| ISP 4 medium<br>(Inorganic salt-starch agar)       | Grey            | Yellowish grey<br>(Not-distinctive) | Non-pigmented      | Excellent |
| ISP 5 medium<br>(Glycerol asparagines agar)        | Greyish beige   | Yellowish grey<br>(Not-distinctive) | Non-pigmented      | Excellent |
| ISP 6 medium<br>(Peptone-yeast extract iron agar)  | Whitish grey    | Faint yellow<br>(Not-distinctive)   | Non-pigmented      | Good      |
| ISP 7 medium<br>(Tyrosine agar)                    | Whitish grey    | Faint yellow<br>(Not-distinctive)   | Non-pigmented      | Excellent |

The substrate mycelium pigment was not pH sensitive when tested with 0.05 N NaOH or 0.05 N HCl.

The diffusible pigment was not pH sensitive when tested with 0.05 N NaOH or 0.05 N HCl.
